## Erratum

Walker, J. A. and Westneat, M. W. (2002). Performance limits of labriform propulsion and correlates with fin shape and motion. *J. Exp. Biol.* **205**, 177–187.

In the printed version of this paper, the values for M2 and M3 in Table 1 were incorrect. The correct version of the table is given below and in the online version.

Table 1. *Fin shape data for four species of labrid fish*

| Species       | <i>Gomphosus</i><br><i>varius</i><br>(N=10) | <i>Halichoeres</i><br><i>bivittatus</i><br>(N=8) | <i>Cirrhilabrus</i><br><i>rubripinnis</i><br>(N=6) | <i>Pseudocheilinus</i><br><i>octotenia</i><br>(N=7) |
|---------------|---------------------------------------------|--------------------------------------------------|----------------------------------------------------|-----------------------------------------------------|
| TL (mm)       | 133.50±21.69                                | 144.56±22.98                                     | 77.00±3.69                                         | 88.00±7.17                                          |
| $\mathcal{R}$ | 3.49±0.3                                    | 2.34±0.46                                        | 2.94±0.25                                          | 1.52±0.18                                           |
| S1            | 1.32±0.06                                   | 1.08±0.11                                        | 1.21±0.05                                          | 0.87±0.05                                           |
| S6            | 0.50±0.05                                   | 0.65±0.05                                        | 0.57±0.07                                          | 0.60±0.05                                           |
| C1            | 0.78±0.10                                   | 0.60±0.06                                        | 0.85±0.05                                          | 0.47±0.05                                           |
| C5            | 0.55±0.12                                   | 1.23±0.43                                        | 0.41±0.08                                          | 2.21±0.19                                           |
| M1            | 0.47±0.03                                   | 0.59±0.07                                        | 0.46±0.02                                          | 0.71±0.03                                           |
| M2            | 0.52±0.05                                   | 0.63±0.05                                        | 0.51±0.01                                          | 0.73±0.03                                           |
| M3            | 0.57±0.04                                   | 0.67±0.05                                        | 0.56±0.01                                          | 0.75±0.01                                           |

Values are means  $\pm$  S.D.

TL, total fish length;  $\mathcal{R}$ , aspect ratio; S1, leading-edge span relative to the square root of fin area; S6, the trailing-edge span relative to the square root of fin area; C1, the mean chord of the first (proximal-most) element relative to the mean chord of the fin; C5, the mean chord of the fifth (distal-most) element relative to the mean chord of the fin; M1, M2, M3, the standardized first, second and third moments of fin area.

The authors apologise for any inconvenience this error may have caused.
